# Supplementary material
Source: HighWire-hosted journal article supplement (https://bmjopen.bmj.com/content/9/8/e027822)
Supplement: inline-supplementary-material-1 [file inline-supplementary-material-1.pdf]

PRISMA-P checklist: *Cost of Maternal Health Services in Low- and Middle-Income Countries: Protocol for a Systematic Review* – Banke-Thomas et al. 2018

| Checklist # | Checklist item                                                                                                                                                                                                             | Achieved | Verification                    |
|-------------|----------------------------------------------------------------------------------------------------------------------------------------------------------------------------------------------------------------------------|----------|---------------------------------|
| 1a          | Identify the report as a protocol of a systematic review.                                                                                                                                                                  | Yes      | Stated in the title             |
| 1b          | If the protocol is for an update of a previous systematic review, identify as such.                                                                                                                                        | N/A      |                                 |
| 2           | If registered, provide the name of the registry (e.g., PROSPERO) and registration number.                                                                                                                                  | Yes      | PROSPERO Reg. #: CRD42018114124 |
| 3a          | Provide name, institutional affiliation, and e-mail address of all protocol authors; provide physical mailing address of corresponding author.                                                                             | Yes      | Achieved in Title page.         |
| 3b          | Describe contributions of protocol authors and identify the guarantor of the review.                                                                                                                                       | Yes      | Article footnote.               |
| 4           | If the protocol represents an amendment of a previously completed or published protocol, identify as such and list changes; otherwise, state plan for documenting important protocol amendments.                           | N/A      |                                 |
| 5a          | Indicate sources of financial or other support for the review.                                                                                                                                                             | N/A      |                                 |
| 5b          | Provide name for the review funder and/or sponsor.                                                                                                                                                                         | N/A      |                                 |
| 5c          | Provide name for the review funder and/or sponsor.                                                                                                                                                                         | N/A      |                                 |
| 6           | Describe the rationale for the review in the context of what is already known.                                                                                                                                             | Yes      | Introduction                    |
| 7           | Provide an explicit statement of the question(s) the review will address with reference to participants, interventions, comparators, and outcomes (PICO).                                                                  | Yes      | Introduction                    |
| 8           | Specify the study characteristics (e.g., PICO, study design, setting, time frame) and report characteristics (e.g., years considered, language, publication status) to be used as criteria for eligibility for the review. | Yes      | Methods and analysis            |
| 9           | Describe all intended information sources (e.g., electronic databases, contact with study authors, trial registers, or other grey literature sources) with planned dates of coverage.                                      | Yes      | Methods and analysis            |
| 10          | Present draft of search strategy to be used for at least one electronic database, including planned limits, such that it could be repeated.                                                                                | Yes      | Table 1                         |
| 11a         | Describe the mechanism(s) that will be used to manage records and data throughout the review.                                                                                                                              | Yes      | Methods and analysis            |
| 11b         | State the process that will be used for selecting studies (e.g., two independent reviewers) through each phase of the review (i.e., screening, eligibility, and inclusion in meta-analysis).                               | Yes      | Methods and analysis            |
| 11c         | Describe planned method of extracting data from reports (e.g., piloting forms, done independently, in duplicate), any processes for obtaining and confirming data from investigators.                                      | Yes      | Methods and analysis            |
| 12          | List and define all variables for which data will be sought (e.g., PICO items, funding sources), any pre-planned data assumptions and simplifications.                                                                     | Yes      | Methods and analysis            |
| 13          | List and define all outcomes for which data will be sought, including prioritization of main and additional outcomes, with rationale.                                                                                      | N/A      |                                 |
| 14          | Describe anticipated methods for assessing risk of bias of individual studies, including whether this will be done at the outcome or study level, or both; state how this information will be used in data synthesis.      | N/A      |                                 |
| 15a         | Describe criteria under which study data will be quantitatively synthesized.                                                                                                                                               | Yes      | Methods and analysis            |
| 15b         | If data are appropriate for quantitative synthesis, describe planned summary measures, methods of handling data, and methods of combining data from studies, including any planned exploration of consistency.             | Yes      | Methods and analysis            |
| 15c         | Describe any proposed additional analyses (e.g., sensitivity or subgroup analyses, meta-regression).                                                                                                                       | Yes      | Methods and analysis            |
| 15d         | If quantitative synthesis is not appropriate, describe the type of summary planned.                                                                                                                                        | Yes      | Methods and analysis            |
| 16          | Specify any planned assessment of meta-bias(es) (e.g., publication bias across studies, selective reporting within studies).                                                                                               | Yes      | Methods and analysis            |
| 17          | Describe how the strength of the body of evidence will be assessed (e.g., GRADE).                                                                                                                                          | Yes      | Methods and analysis            |
