# Supplementary material
Source: HighWire-hosted journal article supplement (https://bmjopen.bmj.com/content/9/8/e027822)
Supplement: inline-supplementary-material-2 [file inline-supplementary-material-2.pdf]

## Full search strategy in Scopus – Banke-Thomas et al. 2018

## Online supplementary material S2: Full search strategy implemented in Scopus

| Search conducted                                                                  | Specific search term and number of records retrieved                                                                                                                                                                                                                                                                                                                                                                                                                                                                                                                                                                                                                                                                                                                                                                                                                                                                                                                                                                                                                                                                                                                                                                                                                                                                                                                                                                                                                                                                                                                                                                                                                                                                                                                                                                                                                                                                                                                                                                                                                                                                                                                                                                                                                                                                                                                                                                                                                                                                                                                                                                                                                                                                                                                                                                                                                                                                                                                                                                                                                                                                                                                                                                                                                                                                                                                                                                                                                                                                                                         |
|-----------------------------------------------------------------------------------|--------------------------------------------------------------------------------------------------------------------------------------------------------------------------------------------------------------------------------------------------------------------------------------------------------------------------------------------------------------------------------------------------------------------------------------------------------------------------------------------------------------------------------------------------------------------------------------------------------------------------------------------------------------------------------------------------------------------------------------------------------------------------------------------------------------------------------------------------------------------------------------------------------------------------------------------------------------------------------------------------------------------------------------------------------------------------------------------------------------------------------------------------------------------------------------------------------------------------------------------------------------------------------------------------------------------------------------------------------------------------------------------------------------------------------------------------------------------------------------------------------------------------------------------------------------------------------------------------------------------------------------------------------------------------------------------------------------------------------------------------------------------------------------------------------------------------------------------------------------------------------------------------------------------------------------------------------------------------------------------------------------------------------------------------------------------------------------------------------------------------------------------------------------------------------------------------------------------------------------------------------------------------------------------------------------------------------------------------------------------------------------------------------------------------------------------------------------------------------------------------------------------------------------------------------------------------------------------------------------------------------------------------------------------------------------------------------------------------------------------------------------------------------------------------------------------------------------------------------------------------------------------------------------------------------------------------------------------------------------------------------------------------------------------------------------------------------------------------------------------------------------------------------------------------------------------------------------------------------------------------------------------------------------------------------------------------------------------------------------------------------------------------------------------------------------------------------------------------------------------------------------------------------------------------------------|
| Services (Year 2000 onwards)                                                      | (TITLE-ABS-KEY ("ante*natal care" OR anc OR "birth" OR "skilled birth attendance" OR "obstetric emergenc*" OR "emergency obstetric care" OR "emergency obstetric and newborn care" OR emoc OR emonc) AND PUBYEAR > 1999) OR (TITLE-ABS-KEY ("caesarean*" OR "vacuum" OR "post*natal care" OR "PNC" OR obstetric OR newborn OR delivery OR maternity OR "family planning" OR contraception) AND PUBYEAR > 1999)<br><br>1,585,263 records                                                                                                                                                                                                                                                                                                                                                                                                                                                                                                                                                                                                                                                                                                                                                                                                                                                                                                                                                                                                                                                                                                                                                                                                                                                                                                                                                                                                                                                                                                                                                                                                                                                                                                                                                                                                                                                                                                                                                                                                                                                                                                                                                                                                                                                                                                                                                                                                                                                                                                                                                                                                                                                                                                                                                                                                                                                                                                                                                                                                                                                                                                                      |
| Cost (Year 2000 onwards)                                                          | TITLE-ABS-KEY (cost* OR "cost of care" OR "cost*analysis" OR "cost*effectiveness" OR "cost*utility" OR "cost*benefit" OR "economic evaluation") AND PUBYEAR > 1999<br><br>2,029,490 records                                                                                                                                                                                                                                                                                                                                                                                                                                                                                                                                                                                                                                                                                                                                                                                                                                                                                                                                                                                                                                                                                                                                                                                                                                                                                                                                                                                                                                                                                                                                                                                                                                                                                                                                                                                                                                                                                                                                                                                                                                                                                                                                                                                                                                                                                                                                                                                                                                                                                                                                                                                                                                                                                                                                                                                                                                                                                                                                                                                                                                                                                                                                                                                                                                                                                                                                                                  |
| Service AND cost (Year 2000 onwards)                                              | ((TITLE-ABS-KEY ("ante*natal care" OR anc OR "birth" OR "skilled birth attendance" OR "obstetric emergenc*" OR "emergency obstetric care" OR "emergency obstetric and newborn care" OR emoc OR emonc) AND PUBYEAR > 1999) OR (TITLE-ABS-KEY ("caesarean*" OR "vacuum" OR "post*natal care" OR "PNC" OR obstetric OR newborn OR delivery OR maternity OR "family planning" OR contraception) AND PUBYEAR > 1999)) AND (TITLE-ABS-KEY (cost* OR "cost of care" OR "cost*analysis" OR "cost*effectiveness" OR "cost*utility" OR "cost*benefit" OR "economic evaluation") AND PUBYEAR > 1999)<br><br>112,253 records                                                                                                                                                                                                                                                                                                                                                                                                                                                                                                                                                                                                                                                                                                                                                                                                                                                                                                                                                                                                                                                                                                                                                                                                                                                                                                                                                                                                                                                                                                                                                                                                                                                                                                                                                                                                                                                                                                                                                                                                                                                                                                                                                                                                                                                                                                                                                                                                                                                                                                                                                                                                                                                                                                                                                                                                                                                                                                                                             |
| Service AND cost (Year 2000 onwards, limited by language)                         | ((TITLE-ABS-KEY ("ante*natal care" OR anc OR "birth" OR "skilled birth attendance" OR "obstetric emergenc*" OR "emergency obstetric care" OR "emergency obstetric and newborn care" OR emoc OR emonc) AND PUBYEAR > 1999) OR (TITLE-ABS-KEY ("caesarean*" OR "vacuum" OR "post*natal care" OR "PNC" OR obstetric OR newborn OR delivery OR maternity OR "family planning" OR contraception) AND PUBYEAR > 1999)) AND (TITLE-ABS-KEY (cost* OR "cost of care" OR "cost*analysis" OR "cost*effectiveness" OR "cost*utility" OR "cost*benefit" OR "economic evaluation") AND PUBYEAR > 1999) AND (LIMIT-TO (LANGUAGE, "English") OR LIMIT-TO (LANGUAGE, "French"))<br><br>107,929 records                                                                                                                                                                                                                                                                                                                                                                                                                                                                                                                                                                                                                                                                                                                                                                                                                                                                                                                                                                                                                                                                                                                                                                                                                                                                                                                                                                                                                                                                                                                                                                                                                                                                                                                                                                                                                                                                                                                                                                                                                                                                                                                                                                                                                                                                                                                                                                                                                                                                                                                                                                                                                                                                                                                                                                                                                                                                       |
| Service AND cost (Year 2000 onwards, limited by language and country of interest) | ((TITLE-ABS-KEY ("ante*natal care" OR anc OR "birth" OR "skilled birth attendance" OR "obstetric emergenc*" OR "emergency obstetric care" OR "emergency obstetric and newborn care" OR emoc OR emonc) AND PUBYEAR > 1999) OR (TITLE-ABS-KEY ("caesarean*" OR "vacuum" OR "post*natal care" OR "PNC" OR obstetric OR newborn OR delivery OR maternity OR "family planning" OR contraception) AND PUBYEAR > 1999)) AND (TITLE-ABS-KEY (cost* OR "cost of care" OR "cost*analysis" OR "cost*effectiveness" OR "cost*utility" OR "cost*benefit" OR "economic evaluation") AND PUBYEAR > 1999) AND (LIMIT-TO (LANGUAGE, "English") OR LIMIT-TO (LANGUAGE, "French")) AND (LIMIT-TO (AFFILCOUNTRY, "India") OR LIMIT-TO (AFFILCOUNTRY, "Iran") OR LIMIT-TO (AFFILCOUNTRY, "Pakistan") OR LIMIT-TO (AFFILCOUNTRY, "Nigeria") OR LIMIT-TO (AFFILCOUNTRY, "Thailand") OR LIMIT-TO (AFFILCOUNTRY, "Kenya") OR LIMIT-TO (AFFILCOUNTRY, "Egypt") OR LIMIT-TO (AFFILCOUNTRY, "Uganda") OR LIMIT-TO (AFFILCOUNTRY, "Bangladesh") OR LIMIT-TO (AFFILCOUNTRY, "Indonesia") OR LIMIT-TO (AFFILCOUNTRY, "Ghana") OR LIMIT-TO (AFFILCOUNTRY, "Tanzania") OR LIMIT-TO (AFFILCOUNTRY, "Ethiopia") OR LIMIT-TO (AFFILCOUNTRY, "Viet Nam") OR LIMIT-TO (AFFILCOUNTRY, "Malawi") OR LIMIT-TO (AFFILCOUNTRY, "Philippines") OR LIMIT-TO (AFFILCOUNTRY, "Nepal") OR LIMIT-TO (AFFILCOUNTRY, "Zambia") OR LIMIT-TO (AFFILCOUNTRY, "Tunisia") OR LIMIT-TO (AFFILCOUNTRY, "Lebanon") OR LIMIT-TO (AFFILCOUNTRY, "Peru") OR LIMIT-TO (AFFILCOUNTRY, "Burkina Faso") OR LIMIT-TO (AFFILCOUNTRY, "Sri Lanka") OR LIMIT-TO (AFFILCOUNTRY, "Morocco") OR LIMIT-TO (AFFILCOUNTRY, "Zimbabwe") OR LIMIT-TO (AFFILCOUNTRY, "Cameroon") OR LIMIT-TO (AFFILCOUNTRY, "Rwanda") OR LIMIT-TO (AFFILCOUNTRY, "Congo") OR LIMIT-TO (AFFILCOUNTRY, "Senegal") OR LIMIT-TO (AFFILCOUNTRY, "Mozambique") OR LIMIT-TO (AFFILCOUNTRY, "Botswana") OR LIMIT-TO (AFFILCOUNTRY, "Mali") OR LIMIT-TO (AFFILCOUNTRY, "Iraq") OR LIMIT-TO (AFFILCOUNTRY, "Cuba") OR LIMIT-TO (AFFILCOUNTRY, "Sudan") OR LIMIT-TO (AFFILCOUNTRY, "Benin") OR LIMIT-TO (AFFILCOUNTRY, "Gambia") OR LIMIT-TO (AFFILCOUNTRY, "Guatemala") OR LIMIT-TO (AFFILCOUNTRY, "Papua New Guinea") OR LIMIT-TO (AFFILCOUNTRY, "Cote d'Ivoire") OR LIMIT-TO (AFFILCOUNTRY, "Jamaica") OR LIMIT-TO (AFFILCOUNTRY, "Afghanistan") OR LIMIT-TO (AFFILCOUNTRY, "Kazakhstan") OR LIMIT-TO (AFFILCOUNTRY, "Madagascar") OR LIMIT-TO (AFFILCOUNTRY, "Panama") OR LIMIT-TO (AFFILCOUNTRY, "Laos") OR LIMIT-TO (AFFILCOUNTRY, "Myanmar") OR LIMIT-TO (AFFILCOUNTRY, "Fiji") OR LIMIT-TO (AFFILCOUNTRY, "Haiti") OR LIMIT-TO (AFFILCOUNTRY, "Moldova") OR LIMIT-TO (AFFILCOUNTRY, "Bolivia") OR LIMIT-TO (AFFILCOUNTRY, "Honduras") OR LIMIT-TO (AFFILCOUNTRY, "Niger") OR LIMIT-TO (AFFILCOUNTRY, "Namibia") OR LIMIT-TO (AFFILCOUNTRY, "El Salvador") OR LIMIT-TO (AFFILCOUNTRY, "Gabon") OR LIMIT-TO (AFFILCOUNTRY, "Sierra Leone") OR LIMIT-TO (AFFILCOUNTRY, "Syrian Arab Republic") OR LIMIT-TO (AFFILCOUNTRY, "Yemen") OR LIMIT-TO (AFFILCOUNTRY, "Uzbekistan") OR LIMIT-TO (AFFILCOUNTRY, "Democratic Republic Congo") OR LIMIT-TO (AFFILCOUNTRY, "Libyan Arab Jamahiriya") OR LIMIT-TO (AFFILCOUNTRY, "Togo") OR LIMIT-TO (AFFILCOUNTRY, "Burundi") OR LIMIT-TO (AFFILCOUNTRY, "Swaziland") OR LIMIT-TO (AFFILCOUNTRY, "Angola") OR LIMIT-TO (AFFILCOUNTRY, "Eritrea") OR LIMIT-TO (AFFILCOUNTRY, "Guinea") OR LIMIT-TO (AFFILCOUNTRY, "Lesotho") OR LIMIT-TO (AFFILCOUNTRY, "Chad") OR LIMIT-TO (AFFILCOUNTRY, "Undefined"))<br><br>12,529 records |
